# Supplementary material for: Trigeminal Neuralgia Is a Dementia Risk Factor: A Retrospective Cohort Study
Source: MDPI journal article supplement (doi:10.3390/ijerph19106073), 2022-05-17
Supplement: s1 [file s1]

**Table S1.** Significant predictors of dementia after trigeminal neuralgia diagnosis.

| Variables                        | Adjusted HR* | 95% CI      | P-value |
|----------------------------------|--------------|-------------|---------|
| Age                              | 2.89         | (2.08-4.04) | <0.001  |
| Depression                       | 2.80         | (1.77-4.44) | <0.001  |
| Parkinson's disease              | 1.99         | (1.23-3.21) | 0.005   |
| Charlson Comorbidity Index score | 1.76         | (1.13-2.75) | 0.012   |
| Traumatic brain injury           | 1.81         | (1.15-2.86) | 0.011   |
| Coronary artery disease          | 1.70         | (1.08-2.68) | 0.022   |

HR, hazard ratio; 95% CI, 95% confidence interval. \*Adjusted HR and 95% CI were estimated by stepwise Cox proportional hazards regression method; the model was adjusted for age, sex, Charlson Comorbidity Index score, relevant comorbidities, and medications.

**Table S2.** Joint effect of trigeminal neuralgia and comorbidities on dementia risk.

| Variables                   |                                | <i>n</i> | Dementia | Rate  | Adjusted HR* (95% CI)               |
|-----------------------------|--------------------------------|----------|----------|-------|-------------------------------------|
| <b>Trigeminal neuralgia</b> | <b>Depression</b>              |          |          |       |                                     |
| No                          | No                             | 2494     | 120      | 3.24  | 1.00 (Reference)                    |
| No                          | Yes                            | 554      | 75       | 9.49  | 2.03 (1.49-2.74) <sup>&amp;</sup>   |
| Yes                         | No                             | 491      | 29       | 10.13 | 3.68 (2.25-6.00) <sup>&amp;</sup>   |
| Yes                         | Yes                            | 271      | 55       | 36.19 | 10.51 (6.78-16.28) <sup>&amp;</sup> |
| <b>Trigeminal neuralgia</b> | <b>Parkinson's disease</b>     |          |          |       |                                     |
| No                          | No                             | 2937     | 157      | 3.62  | 1.00 (Reference)                    |
| No                          | Yes                            | 111      | 38       | 25.14 | 2.42 (1.67 -3.49) <sup>&amp;</sup>  |
| Yes                         | No                             | 694      | 58       | 14.56 | 4.67 (3.11 -7.00) <sup>&amp;</sup>  |
| Yes                         | Yes                            | 68       | 26       | 64.72 | 9.81 (5.89 -16.40) <sup>&amp;</sup> |
| <b>Trigeminal neuralgia</b> | <b>Traumatic brain injury</b>  |          |          |       |                                     |
| No                          | No                             | 2578     | 132      | 3.47  | 1.00 (Reference)                    |
| No                          | Yes                            | 470      | 63       | 9.34  | 1.60 (1.18-2.18) <sup>#</sup>       |
| Yes                         | No                             | 573      | 52       | 15.59 | 4.45 (2.92-6.78) <sup>&amp;</sup>   |
| Yes                         | Yes                            | 189      | 32       | 30.53 | 7.25 (4.47-11.87) <sup>&amp;</sup>  |
| <b>Trigeminal neuralgia</b> | <b>Coronary artery disease</b> |          |          |       |                                     |
| No                          | No                             | 2658     | 140      | 3.57  | 1.00 (Reference)                    |
| No                          | Yes                            | 390      | 55       | 9.82  | 1.10 (0.79-1.54)                    |
| Yes                         | No                             | 634      | 51       | 14.18 | 3.94 (2.57-6.02) <sup>&amp;</sup>   |
| Yes                         | Yes                            | 128      | 33       | 41.85 | 6.14 (3.78-10.00) <sup>&amp;</sup>  |

Rate, incidence rate per 1000 person-years; CI, confidence interval; HR, hazard ratio. \* Model adjusted for age, sex, Charlson Comorbidity Index score, relevant comorbidities, and medications. <sup>&</sup>  $p < 0.001$ . <sup>#</sup>  $p = 0.003$ .
